# Supplementary material for: Pubertal development in girls by breast cancer family history: the LEGACY girls cohort
Source: Springer Nature journal article supplement (doi:10.1186/s13058-017-0849-y), 2017-06-08

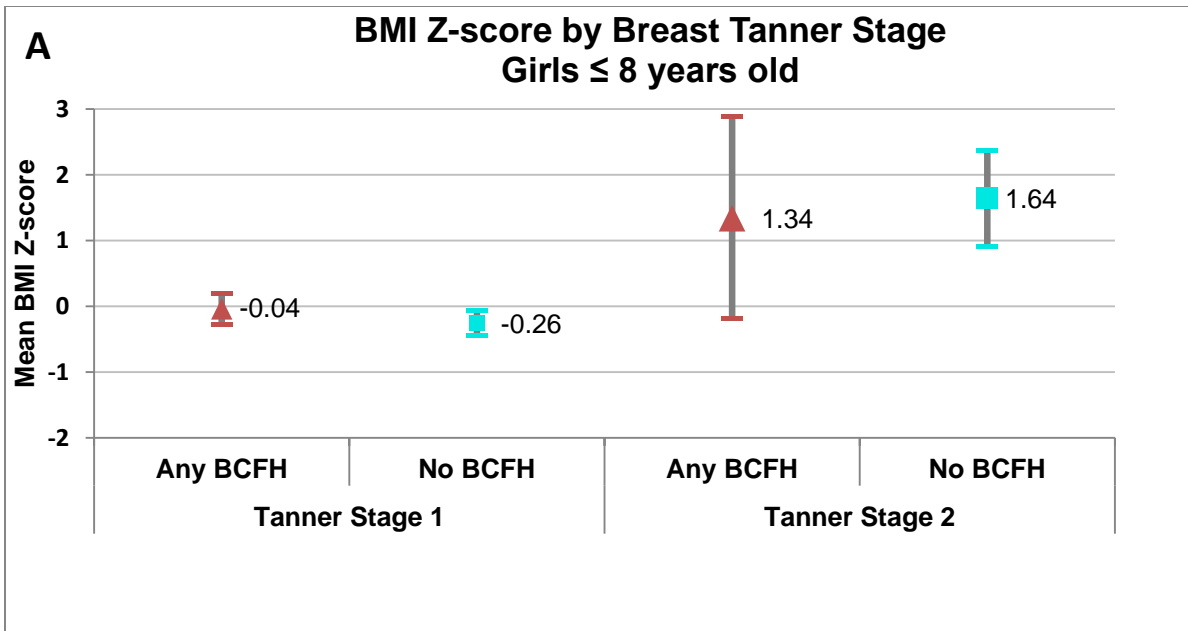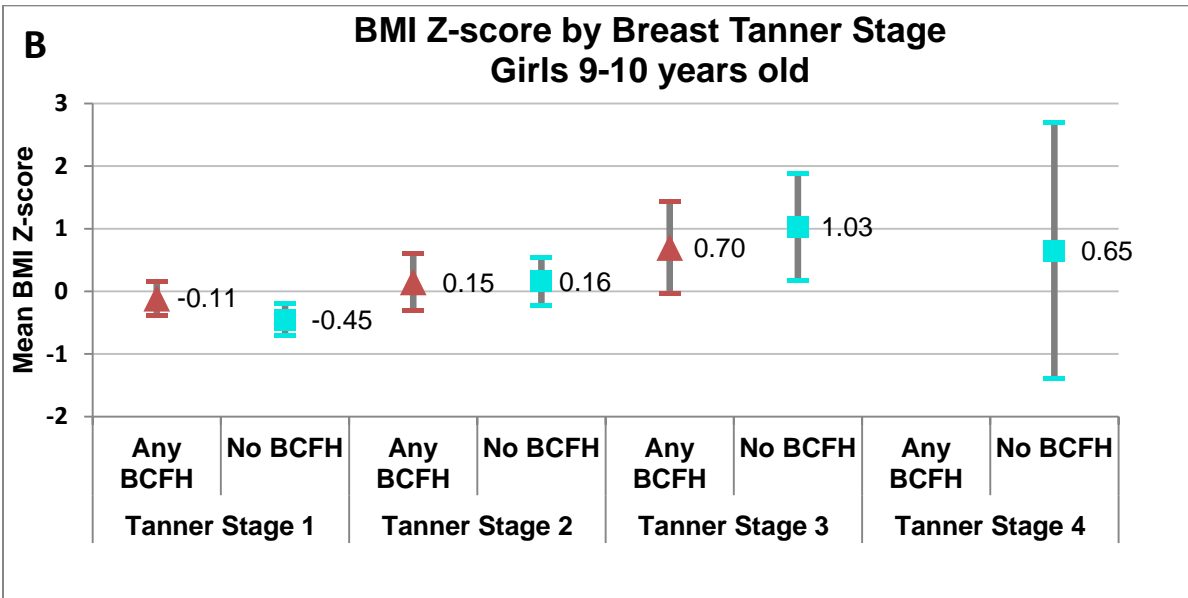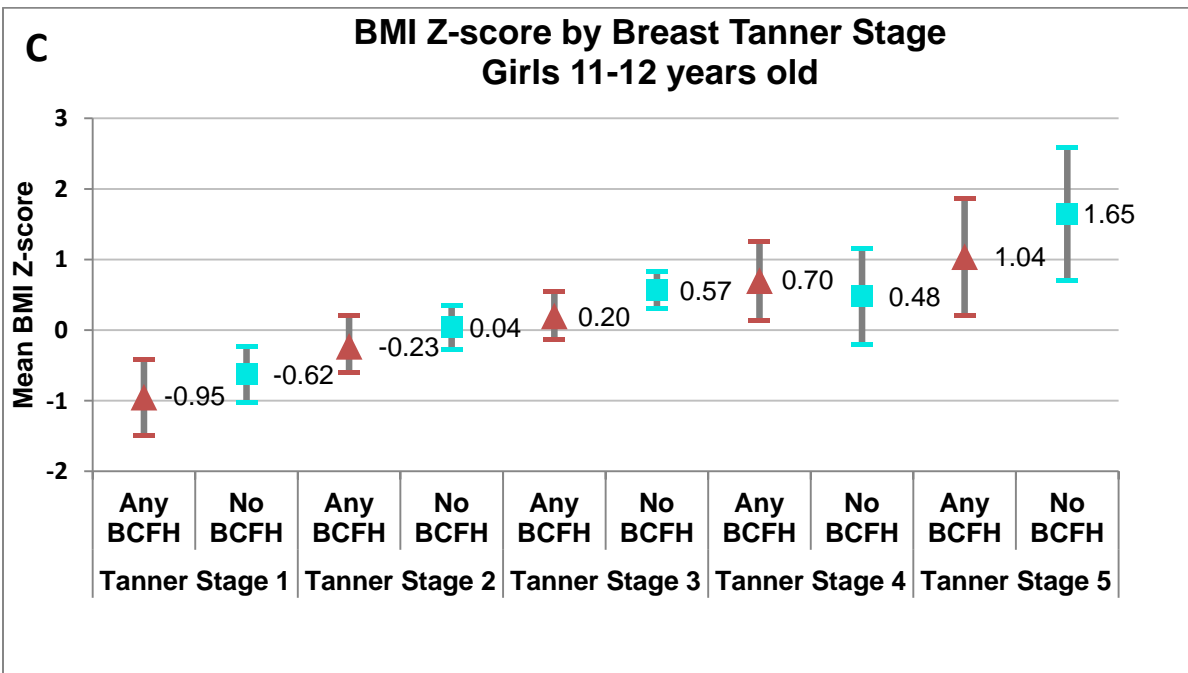

Supplement: MOESM2 [file 12351512]
